# Supplementary material
Source: HighWire-hosted journal article supplement (https://www.cmajopen.ca/highwire/filestream/90073/field_highwire_adjunct_files/0/open-2022-0086-1-at.pdf)
Supplement: open-2022-0086-1-at.pdf [file open-2022-0086-1-at.pdf]

## Supplemental File

### Interrupted Time Series Segmented Regression Model

$$Y_t = \beta_0 + \beta_1 \text{COVID}_t + \beta_2 \text{Month}_t + \beta_3 (\text{Month after COVID onset})_t + \varepsilon_t$$

Where,  $Y_t$  is the ALC rate measured at time  $t$ ;

**“COVID”** is an indicator variable coded as 0 for pre-COVID period (i.e., the period before March 2020) and 1 for the period of COVID presence (i.e., the period after March 2020);

**“Month”** is the number of months from the start of the study;

**“Month after COVID onset”** indicates the number of months after COVID presence and takes value 0 for pre-COVID period;

$\beta_0$  is the intercept estimating the initial ALC rate at month 0 (i.e., February 2018);

$\beta_1$  estimates the change in level of ALC rate for post/onset COVID period (i.e., After March 2020);

$\beta_2$  is the pre-COVID slope and measures the change in ALC rates in the pre-COVID segments;

$\beta_3$  is the change in the monthly slope after March 2020;

$\varepsilon_t$  is the error term for month  $t$  which is assumed to be normally distributed with stable variance and first order autocorrelation.
